# Supplementary material for: Targeting the LOX/hypoxia axis reverses many of the features that make pancreatic cancer deadly: inhibition of LOX abrogates metastasis and enhances drug efficacy
Source: PubMed Central journal article supplement (PMC4551344; doi:10.15252/emmm.201404827), 2015-06-15
Supplement: emmm0007-1063-sd14.pdf [file emmm0007-1063-sd14.pdf]

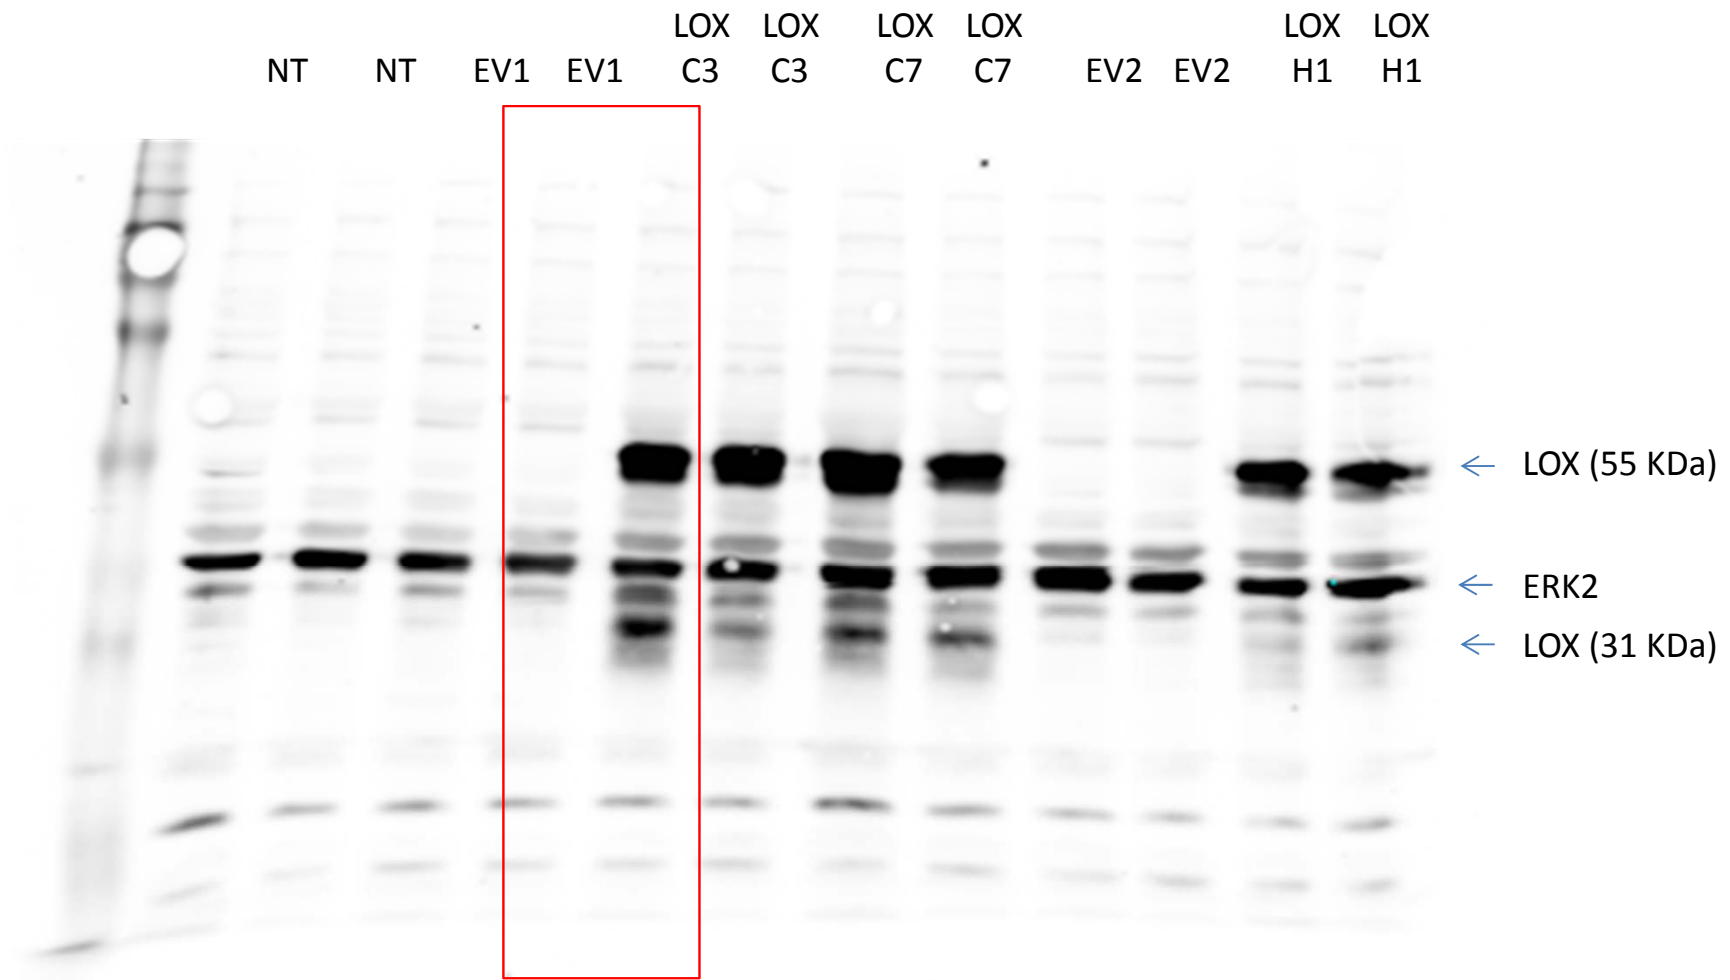

Figure 2
